# Supplementary material for: Circulating Tumor DNA as a Preoperative Marker of Recurrence in Patients with Peritoneal Metastases of Colorectal Cancer: A Clinical Feasibility Study
Source: MDPI journal article supplement (doi:10.3390/jcm9061738), 2020-06-04
Supplement: s1 [file s1]

**SUPPLEMENTARY TABLE 1C:** mean cfDNA yield (ct+cfDNA) in ng/ml plasma

| Patient ID | CRS-HIPEC (n=24) | Open-close (n=6) | ctDNA detected | final elution volume (ul)* |
|------------|------------------|------------------|----------------|----------------------------|
| L-01       | -                | 4.8              | -              | 58                         |
| L-02       | -                | 6.1              | yes            | 60                         |
| L-03       | 8.1              | -                | -              | 56                         |
| L-04       | 7.8              | -                | -              | 55                         |
| L-05       | 5                | -                | -              | 60                         |
| L-06       | 6.2              | -                | -              | 63                         |
| L-07       | 15.6             | -                | -              | 53                         |
| L-08       | 4.6              | -                | -              | 61                         |
| L-09       | 12.2             | -                | -              | 55                         |
| L-10       | -                | 9.9              | -              | 59                         |
| L-11       | 9.2              | -                | yes            | 60                         |
| L-12       | 12.3             | -                | -              | 59                         |
| L-13       | 13.2             | -                | yes            | 51                         |
| L-14       | 14.8             | -                | -              | 58                         |
| L-15       | 6.5              | -                | -              | 59                         |
| L-16       | 10.7             | -                | -              | 58                         |
| L-17       | 17.4             | -                | -              | 60                         |
| L-18       | 6.7              | -                | yes            | 53                         |
| L-19       | 5.5              | -                | yes            | 54                         |
| L-20       | -                | 8.3              | yes            | 56                         |
| L-21       | -                | 8.7              | -              | 52                         |
| L-22       | 6                | -                | -              | 60                         |
| L-23       | 4.3              | -                | -              | 56                         |
| L-24       | 70.4             | -                | yes            | 57                         |
| L-25       | 13.6             | -                | yes            | 53                         |
| L-26       | 11.2             | -                | yes            | 54                         |
| L-27       | 6.7              | -                | yes            | 60                         |
| L-28       | 11.3             | -                | -              | 52                         |
| L-29       | 6.7              | -                | -              | 50                         |
| L-30       | -                | 4.4              | -              | 60                         |

\*initial elution volume was 90ul before transfer to the final elution tubes
