# Supplementary material for: Circulating Tumor DNA as a Preoperative Marker of Recurrence in Patients with Peritoneal Metastases of Colorectal Cancer: A Clinical Feasibility Study
Source: MDPI journal article supplement (doi:10.3390/jcm9061738), 2020-06-04
Supplement: s1 [file s1]

SUPPLEMENTARY TABLE 1B: ddPCR results of cDNA samples taken pre-operatively and after surgery (CRS-HIPEC or open-close)

| Patient number | mutation detected in metastasis        | ddPCR kit used     | preoperative           |                           |      |                 | up to 1 month after surgery† |                           |     |                 | up to 3 months after surgery† |                           |     |                 | up to 6 months after surgery† |                           |      |                 | up to 12 months after surgery† |                           |          |                 | up to 18 months after surgery† |                           |     |                 | up to 24 months after surgery† |                           |     |                 |
|----------------|----------------------------------------|--------------------|------------------------|---------------------------|------|-----------------|------------------------------|---------------------------|-----|-----------------|-------------------------------|---------------------------|-----|-----------------|-------------------------------|---------------------------|------|-----------------|--------------------------------|---------------------------|----------|-----------------|--------------------------------|---------------------------|-----|-----------------|--------------------------------|---------------------------|-----|-----------------|
|                |                                        |                    | mutant copies/reaction | wild-type copies/reaction | va%  | cDNA input (ng) | mutant copies/reaction       | wild-type copies/reaction | va% | cDNA input (ng) | mutant copies/reaction        | wild-type copies/reaction | va% | cDNA input (ng) | mutant copies/reaction        | wild-type copies/reaction | va%  | cDNA input (ng) | mutant copies/reaction         | wild-type copies/reaction | va%      | cDNA input (ng) | mutant copies/reaction         | wild-type copies/reaction | va% | cDNA input (ng) | mutant copies/reaction         | wild-type copies/reaction | va% | cDNA input (ng) |
| L-1            | KRAS (c. 35G>T; p. G12Vall)            | KRAS G12/13 screen | 0                      | 418                       | 0    | 1.4             |                              |                           |     |                 |                               |                           |     |                 |                               |                           |      |                 |                                |                           |          |                 |                                |                           |     |                 |                                |                           |     |                 |
| L-1            | KRAS (c. 35G>T; p. G12Vall)            | mutation specific  | 0                      | 364                       | 0    | 1.2             |                              |                           |     |                 |                               |                           |     |                 |                               |                           |      |                 |                                |                           |          |                 |                                |                           |     |                 |                                |                           |     |                 |
| L-2            | KRAS (c. 35G>A; p. G12V2Asp)           | KRAS G12/13 screen | 13.2                   | 510                       | 2.5  | 1.7             |                              |                           |     |                 |                               |                           |     |                 |                               |                           |      |                 |                                |                           |          |                 |                                |                           |     |                 |                                |                           |     |                 |
| L-2            | KRAS (c. 35G>A; p. G12V2Asp)           | mutation specific  | 10.6                   | 458                       | 2.7  | 1.5             |                              |                           |     |                 |                               |                           |     |                 |                               |                           |      |                 |                                |                           |          |                 |                                |                           |     |                 |                                |                           |     |                 |
| L-3            | KRAS (c. 35G>A; p. G12V2Asp)           | KRAS G12/13 screen | 0                      | 664                       | 0    | 2.2             | 0                            | 3700                      |     | 12.2            |                               |                           |     |                 |                               |                           |      |                 |                                |                           |          |                 | 0                              | 750                       |     | 2.47            | 0                              | 918                       |     | 3.02            |
| L-3            | KRAS (c. 35G>A; p. G12V2Asp)           | mutation specific  | 0                      | 644                       | 0    | 2.1             | 0                            | 4140                      |     | 13.6            |                               |                           |     |                 |                               |                           |      |                 |                                |                           |          |                 | 0                              | 914                       |     | 3.01            | 1.8                            | 900                       |     | 2.97            |
| L-4            | No KRAS mutation                       | KRAS G12/13 screen | 1.4                    | 550                       | 0.3  | 1.8             | 0                            | 2320                      |     | 7.6             |                               |                           |     |                 |                               |                           |      | 0               | 672                            |                           | 2.21     | 0               | 508                            |                           |     |                 |                                |                           |     |                 |
| L-4            | APC (c. 4348C>T; p. R1450Ter)          | mutation specific  | 0                      | 714                       | 0.0  | 2.3             | 0                            | 3080                      |     | 10.1            |                               |                           |     |                 |                               |                           |      | 0               | 968                            |                           | 3.18     | 0               | 676                            |                           |     |                 |                                |                           |     |                 |
| L-5            | KRAS (c. 34G>T; p. G12V1Cys)           | KRAS G12/13 screen | 0                      | 420                       | 0    | 1.4             | 0                            | 3020                      |     | 9.9             |                               |                           |     |                 |                               |                           |      | 1.4             | 538                            |                           | 1.77     |                 |                                |                           |     |                 |                                |                           |     |                 |
| L-5            | TP53 (c. R176>T; p. Arg273Cys)         | mutation specific  | 1.4                    | 384                       | 0    | 1.3             | 2.8                          | 3400                      |     | 11.2            |                               |                           |     |                 |                               |                           |      | 1.6             | 636                            |                           | 2.10     |                 |                                |                           |     |                 |                                |                           |     |                 |
| L-5            | KRAS (c. 34G>T; p. G12V1Cys)           | mutation specific  | 0                      | 400                       | 0    | 1.3             | 0                            | 3280                      |     | 10.8            |                               |                           |     |                 |                               |                           |      | 0               | 540                            |                           | 1.78     |                 |                                |                           |     |                 |                                |                           |     |                 |
| L-6            | TP53 (c. 422G>A; p. Cys141Trp)         | mutation specific  | 0                      | 550                       | 0.0  | 1.8             | 0                            | 994                       |     | 3.3             |                               |                           |     | 0               | 766                           |                           | 2.52 |                 |                                |                           |          |                 |                                |                           |     |                 |                                |                           |     |                 |
| L-6            | No KRAS mutation                       | KRAS G12/13 screen | 0                      | 458                       | 0.0  | 1.5             | 0                            | 852                       |     | 2.8             |                               |                           |     | 0               | 658                           |                           | 2.16 |                 |                                |                           |          |                 |                                |                           |     |                 |                                |                           |     |                 |
| L-7            | No KRAS mutation                       | KRAS G12/13 screen | 0                      | 1216                      | 0.0  | 4.0             | 0                            | 1128                      |     | 3.7             |                               |                           |     |                 |                               |                           |      |                 |                                |                           |          |                 |                                |                           |     |                 |                                |                           |     |                 |
| L-7            | FBXW7 (c. 1273C>T; p. Arg25Cys)        | mutation specific  | 0                      | 1302                      | 0.0  | 4.3             | 0                            | 1452                      |     | 4.8             |                               |                           |     |                 |                               |                           |      |                 |                                |                           |          |                 |                                |                           |     |                 |                                |                           |     |                 |
| L-8            | KRAS (c. 35G>A; p. G12V2Asp)           | KRAS G12/13 screen | 0                      | 400                       | 0    | 1.3             | 2.8                          | 6340                      |     | 20.2            |                               |                           |     | 0               | 514                           |                           | 1.69 |                 |                                |                           |          |                 |                                |                           |     |                 |                                |                           |     |                 |
| L-8            | KRAS (c. 35G>A; p. G12V2Asp)           | mutation specific  | 0                      | 344                       | 0    | 1.1             | 1.6                          | 6400                      |     | 21.1            |                               |                           |     | 0               | 588                           |                           | 1.93 |                 |                                |                           |          |                 |                                |                           |     |                 |                                |                           |     |                 |
| L-9            | KRAS (not in screen kit)               | KRAS G12/13 screen | 1.6                    | 870                       | 0.2  | 2.9             | 1.4                          | 6240                      |     | 20.5            |                               |                           |     |                 |                               |                           |      | 0               | 946                            |                           | 3.11     |                 |                                |                           |     |                 |                                |                           |     |                 |
| L-9            | APC (c. 4135G>T; p. Gln137Ter)         | mutation specific  | 0                      | 848                       | 0    | 2.8             | 0                            | 5780                      |     | 19.0            |                               |                           |     |                 |                               |                           |      | 76              | 850                            |                           | 8.21     |                 |                                |                           |     |                 |                                |                           |     |                 |
| L-9            | TP53 (c. R186>A; p. Arg273His)         | mutation specific  | 0                      | 996                       | 0    | 3.3             | 0                            | 6360                      |     | 20.9            |                               |                           |     |                 |                               |                           |      | 116             | 966                            |                           | 10.72    |                 |                                |                           |     |                 |                                |                           |     |                 |
| L-9            | PTEN (c. 650T>A; p. Val217Asp)         | mutation specific  | 0                      | 1214                      | 0    | 4.0             | 0                            | 7780                      |     | 25.6            |                               |                           |     |                 |                               |                           |      | 80              | 1024                           |                           | 7.25     |                 |                                |                           |     |                 |                                |                           |     |                 |
| L-10           | No KRAS mutation                       | KRAS G12/13 screen | 0                      | 736                       | 0    | 2.4             |                              |                           |     |                 |                               |                           |     |                 |                               |                           |      |                 |                                |                           |          |                 |                                |                           |     |                 |                                |                           |     |                 |
| L-10           | TP53 (c. 844C>T; p. Arg282Trp)         | mutation specific  | 0                      | 870                       | 0    | 2.9             |                              |                           |     |                 |                               |                           |     |                 |                               |                           |      |                 |                                |                           |          |                 |                                |                           |     |                 |                                |                           |     |                 |
| L-11           | KRAS (c. 35G>A; p. G12V2Asp)           | KRAS G12/13 screen | 11.4                   | 658                       | 1.7  | 2.2             | 0                            | 1934                      |     | 6.4             |                               |                           |     | 0               | 652                           |                           | 2.14 | 0               | 646                            |                           | 2.13     |                 |                                |                           |     |                 |                                |                           |     |                 |
| L-11           | SMAD4 (c. 403C>T; p. Arg137Ter)        | mutation specific  | 9                      | 804                       | 1.1  | 2.7             | 0                            | 2440                      |     | 8.0             |                               |                           |     | 0               | 890                           |                           | 2.93 | 1.4             | 784                            |                           | 2.58     |                 |                                |                           |     |                 |                                |                           |     |                 |
| L-12           | No KRAS mutation                       | KRAS G12/13 screen | 0                      | 968                       | 0    | 3.2             | 3.2                          | 15980                     |     | 52.6            | 0                             | 940                       |     | 3.09            | 1.6                           | 1150                      |      | 4.45            |                                |                           |          |                 |                                |                           |     |                 |                                |                           |     |                 |
| L-12           | BRAF (c. 1799T>A; p. Val600Glu)        | mutation specific  | 0                      | 978                       | 0    | 3.2             | 0                            | 14920                     |     | 49.1            | 0                             | 0                         |     | 3.01            | 0                             | 1250                      |      | 4.11            |                                |                           |          |                 |                                |                           |     |                 |                                |                           |     |                 |
| L-12           | PK3CA (c. 263G>A; p. Arg88Gln)         | mutation specific  | 0                      | 1034                      | 0    | 3.4             | 0                            | 20160                     |     | 66.3            | 0                             | 1074                      |     | 3.53            | 0                             | 1620                      |      | 5.33            |                                |                           |          |                 |                                |                           |     |                 |                                |                           |     |                 |
| L-13           | KRAS (c. 35G>T; p. G12V2Val)           | KRAS G12/13 screen | 114                    | 918                       | 10.8 | 3.5             | 1.4                          | 2180                      |     | 7.2             |                               |                           |     |                 |                               |                           |      |                 |                                |                           |          |                 |                                |                           |     |                 |                                |                           |     |                 |
| L-13           | APC (c. 4132C>T; p. Gln137Ter)         | mutation specific  | 108                    | 1068                      | 9.2  | 3.9             | 0                            | 2380                      |     | 7.8             |                               |                           |     |                 |                               |                           |      |                 |                                |                           |          |                 |                                |                           |     |                 |                                |                           |     |                 |
| L-13           | TP53 (c. 586C>T; p. Arg196Ter)         | mutation specific  | 128                    | 1122                      | 10.2 | 4.1             | 1.6                          | 2580                      |     | 8.5             |                               |                           |     |                 |                               |                           |      |                 |                                |                           |          |                 |                                |                           |     |                 |                                |                           |     |                 |
| L-13           | KRAS (c. 35G>T; p. G12V2Val)           | mutation specific  | 74                     | 678                       | 9.8  | 2.5             | 1.6                          | 1720                      |     | 5.7             |                               |                           |     |                 |                               |                           |      |                 |                                |                           |          |                 |                                |                           |     |                 |                                |                           |     |                 |
| L-14           | KRAS (c. 180_181delinsAA; p. Gln61Lys) | KRAS G12/13 screen | 0                      | 1040                      | 0    | 3.4             | 3                            | 15540                     |     | 51.1            | 1.4                           | 1282                      |     | 4.22            |                               |                           |      |                 |                                |                           |          |                 |                                |                           |     |                 |                                |                           |     |                 |
| L-14           | TP53 (c. 524G>A; p. Arg179His)         | mutation specific  | 0                      | 1250                      | 0    | 4.1             | 3                            | 16220                     |     | 53.4            | 0                             | 1500                      |     | 4.93            |                               |                           |      |                 |                                |                           |          |                 |                                |                           |     |                 |                                |                           |     |                 |
| L-14           | KRAS (c. 180_181delinsAA; p. Gln61Lys) | mutation specific  | 0                      | 1302                      | 0    | 4.3             | 0                            | 14660                     |     | 48.2            | 0                             | 1372                      |     | 4.51            |                               |                           |      |                 |                                |                           |          |                 |                                |                           |     |                 |                                |                           |     |                 |
| L-15           | KRAS (c. 38G>A; p. G12V13Asp)          | KRAS G12/13 screen | 0                      | 402                       | 0    | 1.3             | 0                            | 2100                      |     | 6.9             |                               |                           |     |                 |                               |                           |      | 0               | 864                            |                           | 2.84     | 0               | 776                            |                           |     |                 |                                |                           |     |                 |
| L-15           | APC (c. 4095C>T; p. Gln1367Ter)        | mutation specific  | 0                      | 632                       | 0    | 2.1             | 1.4                          | 2780                      |     | 9.1             |                               |                           |     | 0               | 1208                          |                           | 3.97 | 4.6             | 940                            |                           | 3.11     |                 |                                |                           |     |                 |                                |                           |     |                 |
| L-15           | SMAD4 (c. 1572G>T; p. Trp524Cys)       | mutation specific  | 0                      | 520                       | 0    | 1.7             | 0                            | 2760                      |     | 9.1             |                               |                           |     | 0               | 1134                          |                           | 3.73 | 0               | 960                            |                           | 3.16     |                 |                                |                           |     |                 |                                |                           |     |                 |
| L-15           | TP53 (c. 701A>G; p. Trp234Cys)         | mutation specific  | 0                      | 550                       | 0    | 1.8             | 0                            | 2620                      |     | 8.6             |                               |                           |     | 0               | 1242                          |                           | 4.09 | 0               | 1086                           |                           | 3.57     |                 |                                |                           |     |                 |                                |                           |     |                 |
| L-16           | KRAS (c. 38G>A; p. G12V13Asp)          | KRAS G12/13 screen | 2.8                    | 860                       | 0.3  | 2.8             | 0                            | 1304                      |     | 4.3             |                               |                           |     | 1.6             | 1338                          |                           | 4.41 |                 |                                |                           |          |                 |                                |                           |     |                 |                                |                           |     |                 |
| L-16           | FBXW7 (c. 1393C>T; p. Arg465Cys)       | mutation specific  | 1.2                    | 846                       | 0.1  | 2.9             | 0                            | 1388                      |     | 4.6             |                               |                           |     | 0               | 1314                          |                           | 4.39 |                 |                                |                           |          |                 |                                |                           |     |                 |                                |                           |     |                 |
| L-16           | APC (c. 4037C>A; p. Ser1346Ter)        | mutation specific  | 3.2                    | 880                       | 0.4  | 2.9             | 0                            | 1506                      |     | 5.0             |                               |                           |     | 0               | 1388                          |                           | 4.57 |                 |                                |                           |          |                 |                                |                           |     |                 |                                |                           |     |                 |
| L-17           | No KRAS mutation                       | KRAS G12/13 screen | 0                      | 1244                      | 0    | 4.1             | 0                            | 1682                      |     | 5.5             | 0                             | 1340                      |     | 4.41            |                               |                           |      |                 |                                |                           |          |                 |                                |                           |     |                 |                                |                           |     |                 |
| L-17           | SMAD4 (c. 1083G>A; p. Arg361His)       | mutation specific  | 0                      | 1560                      | 0    | 5.1             | 0                            | 1740                      |     | 5.7             | 0                             | 1170                      |     | 3.85            |                               |                           |      |                 |                                |                           |          |                 |                                |                           |     |                 |                                |                           |     |                 |
| L-18           | No KRAS mutation                       | KRAS G12/13 screen | 0                      | 546                       | 0    | 1.8             | 0                            | 1524                      |     | 5.0             |                               |                           |     |                 |                               |                           |      | 0               | 2120                           |                           | 6.97     |                 |                                |                           |     |                 |                                |                           |     |                 |
| L-18           | TP53 (c. 586C>T; p. Arg196Ter)         | mutation specific  | 6.6                    | 616                       | 4    | 2.0             | 1.6                          | 1840                      |     | 6.1             |                               |                           |     |                 |                               |                           |      | 16              | 2760                           |                           | 9.13     |                 |                                |                           |     |                 |                                |                           |     |                 |
| L-18           | BRAF V600E                             | mutation specific  | 4.2                    | 458                       | 1    | 1.5             | 0                            | 1500                      |     | 4.9             |                               |                           |     |                 |                               |                           |      | 2.6             | 1842                           |                           | 6.07     |                 |                                |                           |     |                 |                                |                           |     |                 |
| L-19           | No KRAS mutation                       | KRAS G12/13 screen | 0                      | 698                       | 0    | 1.4             | 3.2                          | 15980                     |     | 52.6            |                               |                           |     |                 |                               |                           |      | 0               | 874                            |                           | 2.88     |                 |                                |                           |     |                 |                                |                           |     |                 |
| L-19           | TP53 c.560-1G>A splice variant         | mutation specific  | 11.2                   | 426                       | 3    | 1.4             | 5                            | 14720                     |     | 48.4            |                               |                           |     |                 |                               |                           |      | 11.2            | 914                            |                           | 1.210549 |                 |                                |                           |     |                 |                                |                           |     |                 |
| L-20           | KRAS (c. 35G>A; p. G12V2Asp)           | KRAS G12/13 screen | 6.6                    | 600                       | 1.1  | 2.0             |                              |                           |     |                 |                               |                           |     |                 |                               |                           |      |                 |                                |                           |          |                 |                                |                           |     |                 |                                |                           |     |                 |
| L-20           | TP53 (c. 524G>A; p. Arg179His)         | mutation specific  | 5.2                    | 732                       | 0.7  | 2.4             |                              |                           |     |                 |                               |                           |     |                 |                               |                           |      |                 |                                |                           |          |                 |                                |                           |     |                 |                                |                           |     |                 |
| L-21           | No KRAS mutation                       | KRAS G12/13 screen | 1.4                    | 742                       | 0.2  | 2.4             |                              |                           |     |                 |                               |                           |     |                 |                               |                           |      |                 |                                |                           |          |                 |                                |                           |     |                 |                                |                           |     |                 |
| L-21           | BRAF V600E                             | mutation specific  | 0                      | 662                       | 0.0  | 2.2             |                              |                           |     |                 |                               |                           |     |                 |                               |                           |      |                 |                                |                           |          |                 |                                |                           |     |                 |                                |                           |     |                 |
| L-22           | No KRAS mutation                       | KRAS G12/13 screen | 0                      | 440                       | 0    | 1.4             | 0                            | 838                       |     | 2.8             |                               |                           |     |                 |                               |                           |      |                 |                                |                           |          |                 |                                |                           |     |                 |                                |                           |     |                 |
| L-22           | APC (c. 2626C>T; p. Arg876Ter)         | mutation specific  | 0                      | 476                       | 0    | 1.6             | 0                            | 1054                      |     | 3.5             |                               |                           |     |                 |                               |                           |      |                 |                                |                           |          |                 |                                |                           |     |                 |                                |                           |     |                 |
| L-22           | TP53 (c. 711G>A; p. Met237Ile)         | mutation specific  | 0                      | 492                       | 0    | 1.6             | 0                            | 958                       |     | 3.2             |                               |                           |     |                 |                               |                           |      |                 |                                |                           |          |                 |                                |                           |     |                 |                                |                           |     |                 |
