# Supplementary material for: Circulating Tumor DNA as a Preoperative Marker of Recurrence in Patients with Peritoneal Metastases of Colorectal Cancer: A Clinical Feasibility Study
Source: MDPI journal article supplement (doi:10.3390/jcm9061738), 2020-06-04
Supplement: s1 [file s1]

**SUPPLEMENTARY TABLE 1A:** Mutations detected in peritoneal metastasis solid-tissue for each patient included in the study

| Patient number | Treatment sub-group | Gene   | Mutations identified                     | Variant Allele Frequency (%) | COSMIC ID   | dbSNP ID     | BioRad ddPCR kit reference | ddPCR thresholds for detection |            |
|----------------|---------------------|--------|------------------------------------------|------------------------------|-------------|--------------|----------------------------|--------------------------------|------------|
|                |                     |        |                                          |                              |             |              |                            | Channel 1                      | Channel 2  |
| L-01           | open-close          | KRAS   | (c.35G>T; p.(Gly12Val))                  | 19                           | COSM520     | rs121913529  | dHsaMDV2010005             | 2000                           | 2000       |
| L-02           | open-close          | KRAS   | (c.35G>A; p.(Gly12Asp))                  | HRM and seq                  | COSM521     | rs121913529  | dHsaMDV2510596             | 2000                           | 2300       |
| L-03           | CRS-HIPEC           | KRAS   | (c.35G>A; p.(Gly12Asp))                  | HRM                          | COSM521     | rs121913529  | dHsaMDV2510596             | 2000                           | 2300       |
| L-04           | CRS-HIPEC           | APC    | (c.4348C>T; p.(R1450Ter))                | 15                           | COSM13127   | rs121913332  | dHsaMDV2510508             | 4000                           | 2000       |
| L-05           | CRS-HIPEC           | KRAS   | (c.34G>T; p.(Gly12Cys))                  | 42                           | COSM516     | rs121913530  | dHsaMDV2510584             | 4500                           | 2000       |
| L-05           | CRS-HIPEC           | TP53   | (c.817C>T; p.(Arg273Cys))                | 42                           | COSM10659   | rs121913343  | dHsaMDV2510538             | 4458                           | 2200       |
| L-06           | CRS-HIPEC           | TP53   | (c.422G>A; p.(Cys141Tyr))                | 43                           | COSM43708   | rs587781288  | dHsaMDV2516744             | 3000                           | 2200       |
| L-07           | CRS-HIPEC           | FBXW7  | (c.1273C>T; p.(Arg425Cys))               | 29                           | COSM74637   | rs149680468  | dHsaMDS604541535           | 800                            | 1600       |
| L-08           | CRS-HIPEC           | KRAS   | (c.35G>A; p.(Gly12Asp))                  | 12                           | COSM521     | rs121913529  | dHsaMDV2510596             | 2000                           | 2300       |
| L-09           | CRS-HIPEC           | KRAS   | (c.351A>T; p.(Gly117Asn))                | 16                           | COSM28519   | rs770248150  | not tested in cfDNA        |                                |            |
| L-09           | CRS-HIPEC           | APC    | (c.4135G>T; p.(Glu1379Ter))              | 21                           | COSM18834   | rs121913326  | dHsaMDS2510752             | 2000                           | 2100       |
| L-09           | CRS-HIPEC           | PTEN   | (c.650T>A; p.(Val1217Asp))               | 20                           | COSM1159818 | unknown      | dHsaMDS451895027           | 3000                           | 1700       |
| L-09           | CRS-HIPEC           | TP53   | (c.818G>A; p.(Arg273His))                | 26                           | COSM10660   | rs28934576   | dHsaMDV2010109             | 3100                           | 2800       |
| L-10           | open-close          | TP53   | (c.844C>T; p.(Arg282Trp))                | 20                           | COSM10704   | rs28934574   | dHsaMDV2516902             | 1461                           | 1638       |
| L-11           | CRS-HIPEC           | ATM    | (c.1898>T>G)                             | 65                           | unknown     | rs587782124  | not tested in cfDNA        |                                |            |
| L-11           | CRS-HIPEC           | KRAS   | (c.35G>A; p.(Gly12Asp))                  | 50                           | COSM521     | rs121913529  | dHsaMDV2510596             | 2000                           | 2300       |
| L-11           | CRS-HIPEC           | SMAD4  | (c.403C>T; p.(Arg135Ter))                | 46                           | COSM14168   | rs377767326  | dHsaMDS2513354             | 4204                           | 4833       |
| L-12           | CRS-HIPEC           | BRAF   | (c.1799T>A; p.(Val600Glu))               | 4                            | COSM476     | rs113488022  | dHsaMDV2010027             | 2000                           | 2000       |
| L-12           | CRS-HIPEC           | PIK3CA | (c.263G>A; p.(Arg88Gln))                 | 3                            | COSM746     | rs121913287  | dHsaMDV2510558             | 4000                           | 3400       |
| L-13           | CRS-HIPEC           | KRAS   | (c.35G>T; p.(Gly12Val))                  | 47                           | COSM520     | rs121913529  | dHsaMDV2010005             | 2000                           | 2000       |
| L-13           | CRS-HIPEC           | APC    | (c.4132C>T; p.(Q1378Ter))                | 46                           | COSM18862   | rs121913329  | dHsaMDV2516770             | 1200                           | 1150       |
| L-13           | CRS-HIPEC           | TP53   | (c.586C>T; p.(Arg196Ter))                | 50                           | COSM10705   | rs397516435  | dHsaMDV2010121             | 2000                           | 2900       |
| L-14           | CRS-HIPEC           | KRAS   | (c.180_181delinsAA; p.(Gln61Lys))        | 28                           | COSM87298   | unknown      | dHsaMDS716116395           | 5000                           | 2200       |
| L-14           | CRS-HIPEC           | TP53   | (c.524G>A; p.(Arg175His))                | 28                           | COSM10648   | rs28934578   | dHsaMDV2010105             | 1000                           | 1200       |
| L-15           | CRS-HIPEC           | SMAD4  | (c.1572G>T; p.(Trp524Cys))               | 57                           | COSM3388472 | unknown      | dHsaMDS589983490           | 2900                           | 2600       |
| L-15           | CRS-HIPEC           | KRAS   | (c.38G>A; p.(Gly13Asp))                  | 34                           | COSM532     | rs112445441  | dHsaMDV2510598             | not tested                     | not tested |
| L-15           | CRS-HIPEC           | APC    | (c.4099C>T; p.(Gln1367Ter))              | 43                           | COSM13121   | rs121913328  | dHsaMDS2511856             | 1400                           | 1800       |
| L-15           | CRS-HIPEC           | TP53   | (c.701A>G; p.(Tyr234Cys))                | 64                           | COSM10725   | rs587780073  | dHsaMDV2516900             | 2500                           | 2200       |
| L-16           | CRS-HIPEC           | FBXW7  | (c.1393C>T; p.(Arg465Cys))               | 17                           | COSM22932   | rs867384286  | dHsaMDV2510506             | 1400                           | 1850       |
| L-16           | CRS-HIPEC           | KRAS   | (c.38G>A; p.(Gly13Asp))                  | 16                           | COSM532     | rs112445441  | dHsaMDV2510598             | not tested                     | not tested |
| L-16           | CRS-HIPEC           | APC    | (c.4037C>A; p.(Ser1346Ter))              | 17                           | COSM19084   | unknown      | dHsaMDS2515998             | 1500                           | 1800       |
| L-17           | CRS-HIPEC           | SMAD4  | (c.1082G>A; p.(Arg361His))               | 11                           | COSM14122   | rs377767347  | dHsaMDS2515388             | 4800                           | 3400       |
| L-18           | CRS-HIPEC           | BRAF   | (c.1799T>A; p.(Val600Glu))               | 14                           | COSM476     | rs113488022  | dHsaMDV2010027             | 2000                           | 2000       |
| L-18           | CRS-HIPEC           | TP53   | (c.586C>T; p.(Arg196Ter))                | 57                           | COSM10705   | rs397516435  | dHsaMDV2010121             | 2000                           | 2900       |
| L-19           | CRS-HIPEC           | TP53   | (c.560_1G>A)                             | 68                           | COSM43753   | rs1202793339 | dHsaMDS439299774           | 4100                           | 1500       |
| L-20           | open-close          | KRAS   | (c.35G>A; p.(Gly12Asp))                  | 42                           | COSM521     | rs121913529  | dHsaMDV2510596             | 2000                           | 2300       |
| L-20           | open-close          | TP53   | (c.524G>A; p.(Arg175His))                | 28                           | COSM10648   | rs28934578   | dHsaMDV2010105             | 1000                           | 1200       |
| L-21           | open-close          | BRAF   | (c.1799T>A; p.(Val600Glu))               | 12                           | COSM476     | rs113488022  | dHsaMDV2010027             | 2000                           | 2000       |
| L-22           | CRS-HIPEC           | APC    | (c.2626C>T p.(Arg876Ter))                | 64                           | COSM18852   | rs121913333  | dHsaMDS444452080           | 3000                           | 1200       |
| L-22           | CRS-HIPEC           | TP53   | (c.711G>A; p.(Met237Ile))                | 59                           | COSM10834   | rs587782664  | dHsaMDV2516928             | 3100                           | 2400       |
| L-23           | CRS-HIPEC           | APC    | (c.2626C>T p.(Arg876Ter))                | 15                           | COSM18852   | rs121913333  | dHsaMDS444452082           | 3000                           | 1200       |
| L-23           | CRS-HIPEC           | KRAS   | (c.35G>T; p.(Gly12Val))                  | 18                           | COSM520     | rs121913529  | dHsaMDV2010005             | 2000                           | 2000       |
| L-24           | CRS-HIPEC           | PTEN   | (c.1003C>T; p.(Arg335Ter))               | 71                           | COSM5151    | rs121909231  | dHsaMDS593814798           | 5100                           | 4800       |
| L-24           | CRS-HIPEC           | APC    | (c.2626C>T p.(Arg876Ter))                | 38                           | COSM18852   | rs121913333  | dHsaMDS444452081           | 3000                           | 1200       |
| L-24           | CRS-HIPEC           | KRAS   | (c.35G>T; p.(Gly12Val))                  | 61                           | COSM520     | rs121913529  | dHsaMDV2010005             | 2000                           | 2000       |
| L-24           | CRS-HIPEC           | TP53   | (c.524G>A; p.(Arg175His))                | 74                           | COSM10648   | rs28934578   | dHsaMDV2010105             | 1000                           | 1200       |
| L-25           | CRS-HIPEC           | KRAS   | (c.35G>C; p.(Gly12Ala))                  | 37                           | COSM522     | rs121913529  | dHsaMDV2510586             | 2000                           | 2000       |
| L-25           | CRS-HIPEC           | GNAS   | (c.602G>A; p.(Arg201His))                | 12                           | COSM27895   | rs121913495  | not tested in cfDNA        |                                |            |
| L-26           | CRS-HIPEC           | BRAF   | (c.1799T>A; p.(Val600Glu))               | 14                           | COSM476     | rs113488022  | dHsaMDV2010027             | 2000                           | 2000       |
| L-27           | CRS-HIPEC           | KRAS   | (c.35G>A; p.(Gly12Asp))                  | 5                            | COSM521     | rs121913529  | dHsaMDV2510596             | 2000                           | 2300       |
| L-28           | CRS-HIPEC           | KRAS   | (c.34G>T; p.(Gly12Cys))                  | 22                           | COSM516     | rs121913530  | dHsaMDV2510584             | 4500                           | 2000       |
| L-29           | CRS-HIPEC           | TP53   | (c.857A>T; p.(Glu286Val))                | 24                           | COSM43936   | rs1057519985 | dHsaMDS2516076             | 3600                           | 2500       |
| L-30           | open-close          | KRAS   | (c.35G>A; p.(Gly12Asp)) confirmed by HRM | 8                            | COSM521     | rs121913529  | dHsaMDV2510596             | 2000                           | 2300       |
| L-30           | open-close          | GNAS   | (c.602G>A; p.(Arg201His))                | 9                            | COSM27895   | rs121913495  | not tested in cfDNA        |                                |            |

HRM: High Resolution Melt sequencing (no VAF% available)
